# Supplementary material
Source: PubMed Central journal article supplement (PMC3194918)
Supplement: supp_193_21_5905__1.pdf [file supp_193_21_5905__1.pdf]

## Mutational and phylogenetic analyses of the mycobacterial *mbt* gene cluster

Sivagami sundaram Chavadi<sup>1</sup>, Karen L. Stirrett<sup>2‡</sup>, Uthamaphani R. Edupuganti<sup>1</sup>, Olivia Vergnolle<sup>1</sup>, Gigani Sadhanandan<sup>2‡</sup>, Emily Marchiano<sup>2†</sup>, Che Martin<sup>3</sup>, Wei-Gang Qiu<sup>3</sup>, Clifford E. Soll<sup>4</sup>, and Luis E. N. Quadri<sup>1\*</sup>

<sup>1</sup>Department of Biology, Brooklyn College-City University of New York, Brooklyn, NY 11210, USA; <sup>2</sup>Department of Microbiology and Immunology, Weill Medical College of Cornell University, New York, NY 10021, USA; <sup>3</sup>Department Biological Sciences, Hunter College-City University of New York, New York, NY 10065, USA; <sup>4</sup>Department of Chemistry, Hunter College-City University of New York, New York, NY 10065, USA.

\* Corresponding author. Mailing address: Luis E. N. Quadri, Ph.D., Biology Department, Brooklyn College, 2900 Bedford Ave., Brooklyn, NY 11210. Phone: 718-951-5000, Ext. 6254. Fax: 718-951-4659. E-Mail: LQuadri@brooklyn.cuny.edu

‡ Present address: Southeastern Community College, 4564 Chadbourn Hwy., P.O. Box 151, Whiteville, NC 28472.

‡ Present address: New York Methodist Hospital, CAHE, 1401 Kings Hwy., Brooklyn, NY 11229.

† Present address: New Jersey Medical School, UMDNJ, 185 South Orange Ave., Newark, NJ 07103.

## Supplemental Information

---

|                                                                                                                                          |         |
|------------------------------------------------------------------------------------------------------------------------------------------|---------|
| <b>Table S1.</b> Plasmid . . . . .                                                                                                       | Page S2 |
| <b>Table S2.</b> PCR primers and amplicon information used for mutant screening and verification . . . . .                               | Page S3 |
| <b>Figure S1.</b> Agarose gel electrophoresis showing PCR-based confirmation of gene-specific deletions in <i>mbt</i> mutants . . . . .  | Page S4 |
| <b>Table S3.</b> Amplicon information and PCR primer . . . . .                                                                           | Page S5 |
| <b>Figure S2.</b> Mass spectra demonstrating presence of MBTs in <i>Ms ΔmbtH</i> . . . . .                                               | Page S7 |
| <b>Table S4.</b> Sequence accession numbers of 16S rRNA genes and sequence information of <i>mbt</i> genes and their orthologs . . . . . | Page S8 |
| <b>References</b> . . . . .                                                                                                              | Page S9 |

---

**Table S1.** Plasmids

| Plasmid                            | Characteristics                                                                                                                         | Source or Reference |
|------------------------------------|-----------------------------------------------------------------------------------------------------------------------------------------|---------------------|
| pCR2.1Topo                         | Cloning vector, kanamycin resistance and ampicillin resistance genes                                                                    | Invitrogen          |
| pCP0                               | <i>E. coli</i> -mycobacteria shuttle vector for <i>hsp60</i> promoter-driven gene expression in mycobacteria, kanamycin resistance gene | (1)                 |
| p2NIL                              | Vector containing kanamycin resistance gene and OriE                                                                                    | (2)                 |
| pGOAL19                            | Vector containing hygromycin resistance gene, <i>sacB-lacZ Pacl</i> cassette, and OriE                                                  | (2)                 |
| pCP0- <i>mbtA</i>                  | pCP0 expressing <i>mbtA</i> (MSMEG_4516)                                                                                                | This study          |
| pCP0- <i>mbtB</i>                  | pCP0 expressing <i>mbtB</i> (MSMEG_4515)                                                                                                | This study          |
| pCP0- <i>mbtC</i>                  | pCP0 expressing <i>mbtC</i> (MSMEG_4513)                                                                                                | This study          |
| pCP0- <i>mbtD</i>                  | pCP0 expressing <i>mbtD</i> (MSMEG_4512)                                                                                                | This study          |
| pCP0- <i>mbtE</i>                  | pCP0 expressing <i>mbtE</i> (MSMEG_4511)                                                                                                | This study          |
| pCP0- <i>mbtF</i>                  | pCP0 expressing <i>mbtF</i> (MSMEG_4510)                                                                                                | This study          |
| pCP0- <i>mbtG</i>                  | pCP0 expressing <i>mbtG</i> (MSMEG_4509)                                                                                                | This study          |
| pCP0- <i>mbtH</i>                  | pCP0 expressing <i>mbtH</i> (MSMEG_4508)                                                                                                | This study          |
| pCP0- <i>mbtT</i>                  | pCP0 expressing <i>mbtT</i> (MSMEG_4514)                                                                                                | This study          |
| p2NIL-GOALc- $\Delta$ <i>mbtAc</i> | suicide delivery vector carrying a <i>mbtA</i> deletion cassette ( $\Delta$ <i>mbtAc</i> )                                              | This study          |
| p2NIL-GOALc- $\Delta$ <i>mbtBc</i> | suicide delivery vector carrying a <i>mbtB</i> deletion cassette ( $\Delta$ <i>mbtBc</i> )                                              | This study          |
| p2NIL-GOALc- $\Delta$ <i>mbtCc</i> | suicide delivery vector carrying a <i>mbtC</i> deletion cassette ( $\Delta$ <i>mbtCc</i> )                                              | This study          |
| p2NIL-GOALc- $\Delta$ <i>mbtDc</i> | suicide delivery vector carrying a <i>mbtD</i> deletion cassette ( $\Delta$ <i>mbtDc</i> )                                              | This study          |
| p2NIL-GOALc- $\Delta$ <i>mbtEc</i> | suicide delivery vector carrying a <i>mbtE</i> deletion cassette ( $\Delta$ <i>mbtEc</i> )                                              | This study          |
| p2NIL-GOALc- $\Delta$ <i>mbtFc</i> | suicide delivery vector carrying a <i>mbtF</i> deletion cassette ( $\Delta$ <i>mbtFc</i> )                                              | This study          |
| p2NIL-GOALc- $\Delta$ <i>mbtGc</i> | suicide delivery vector carrying a <i>mbtG</i> deletion cassette ( $\Delta$ <i>mbtGc</i> )                                              | This study          |
| p2NIL-GOALc- $\Delta$ <i>mbtHc</i> | suicide delivery vector carrying a <i>mbtH</i> deletion cassette ( $\Delta$ <i>mbtHc</i> )                                              | This study          |
| p2NIL-GOALc- $\Delta$ <i>mbtTc</i> | suicide delivery vector carrying a <i>mbtT</i> deletion cassette ( $\Delta$ <i>mbtTc</i> )                                              | This study          |

**Table S2.** PCR primers and amplicon information used for mutant screening and verification

| Mutant probed | Primer name | Primer sequence (5'-3')                        | Amplicon (bp) |                  |
|---------------|-------------|------------------------------------------------|---------------|------------------|
|               |             |                                                | Mutant strain | Wild-type strain |
| <i>ΔmbtA</i>  | mbtAOR      | GGGTGTGGCGGTCCGCAAATCCTCGACGGTGACCGGAAATTCGTT  | 1332          | 3001             |
|               | mbtAOF      | CGGTGGCATAGACAGACAGGGCTGTCTATTGCCGTTTTTCGGGTTA |               |                  |
|               | mbtAF       | GAATTCGAGGTCCAGCCGTGACTCTGACCA                 | 0             | 1708             |
|               | mbtAR       | AAGCTTTGAGGCGGACCTACCCGCCGAGCT                 |               |                  |
| <i>ΔmbtB</i>  | mbtBOF      | GGATGGGACCTCACGAGTTCGCGTGCAAGGTGCGGGTGGTCGAAA  | 1203          | 4679             |
|               | mbtBOR      | CGATCGTCACGCCCTGATCGCACGAGTACCGGTTGAACGCCTCGT  |               |                  |
|               | mbtB1F      | AAGCTTGTGTTCCGGGAGGCCATATGGGCGA                | 75            | 3552             |
|               | mbtB2R      | GCTAGCAGACCTCGGTGCCCGTCACGATGT                 |               |                  |
| <i>ΔmbtC</i>  | mbtCOF      | CTTCGAGGCGGGCGACTGGACACGGCTCGGGCCGCTGTGTCTGTT  | 1050          | 2319             |
|               | mbtCOR      | GACGCCGTGCACGAACTGGGCGCCCTGGATCTGTACCTGTGAGAA  |               |                  |
|               | mbtCF       | CTGCAGCGTCGCGGAGCTGGTCAATGAGCT                 | 68            | 1337             |
|               | mbtCR       | AAGCTTTCGGTCATCACGCGCCCTCCGGGA                 |               |                  |
| <i>ΔmbtD</i>  | mbtDOF      | ACGAGGACTTCTTCGAACTGGGCGGAGATTCGCTGCTCGCGACCG  | 1148          | 4115             |
|               | mbtDOR      | AACCGTCGTCCCATGCGATGTGGTGTGCGACGAGCAGTACGT     |               |                  |
|               | mbtD2F      | CGAAGTGTCCGGACACCACCGCATCGCGGT                 | 0             | 1582             |
|               | mbtD2R      | GCTAGCATCGGCAATGTCAGTCACGCGAGA                 |               |                  |
| <i>ΔmbtE</i>  | mbtEOF      | CGCGAACCGTCTGCTCGACGTCATGGCGGAACGGCTTCGCTCCGA  | 1176          | 6606             |
|               | mbtEOR      | TCATGATCGCGCCCGGCGAGCCAGCCGATGTAATCACGGTACGGT  |               |                  |
|               | mbtE2F      | CGGATGGCCACC GGCGAGGCCCTTCGACACA               | 0             | 2120             |
|               | mbtE2R      | ACAGCACGTGGTGCTCAGCGGTGGTCAGCA                 |               |                  |
| <i>ΔmbtF</i>  | mbtFOF      | GCTGTGGATGCGTCGGCTGAAGCCGCGAACGGCGTTGCCGCACAA  | 1354          | 5779             |
|               | mbtFOR      | CTGCGCGATGGACAACACACGCGGGTTGCCGGAAAGGATCGACCT  |               |                  |
|               | mbtF1F      | AAGCTTCAGAGCCAAGACGGGAAACGATGA                 | 78            | 4503             |
|               | mbtF3R      | GCTAGCTCGTCTCGTCACTCTCTCGCTCA                  |               |                  |
| <i>ΔmbtG</i>  | mbtGOF      | ACGCGGACAGCCGACACCCGCGCGCTCTTGCGCTGGAAACCCA    | 1247          | 2503             |
|               | mbtGOR      | CCGCGCCGTGAGCAGGTGAAAGCAACCGGTGGAAAATTCGCCGAT  |               |                  |
|               | mbtGF       | GAATTCTCGAGTGAGCGAGACGGTGAGCGA                 | 100           | 1357             |
|               | mbtGR       | AAGCTTGCCGTTGTCGTCATCGAACGGATT                 |               |                  |
| <i>ΔmbtH</i>  | mbtHOF      | CAGTCTATCTCGTCGACATCGGCCAGTTCGCGGAGTGGAT       | 2033          | 2267             |
|               | mbtHOR      | GAGCTCTGGTCCACGCGCCCGGTGTCGGTGATCA             |               |                  |
|               | mbtHF       | CTGCAGAACGATCAGGAGAACCGATGAGCA                 | 71            | 248              |
|               | mbtHR       | AAGCTTCTGAACGGGCCTATCGAACGGCCT                 |               |                  |
| <i>ΔmbtT</i>  | mbtTOF      | CCGCGTCAAGCTCAGCGGCTACCGCATCGAACTGGGCGAGGTCTGA | 1400          | 2090             |
|               | mbtTOR      | GGCGGCAGCGCCGTCGTCGGACAGTGCCTGCTGTTTGGAGAATT   |               |                  |
|               | mbtTF       | CTGCAGCTCGACACCCGCGGACATCGTGA                  | 99            | 787              |
|               | mbtTR       | AAGCTTACCGGGTCTCACCAGAGCTCATT                  |               |                  |

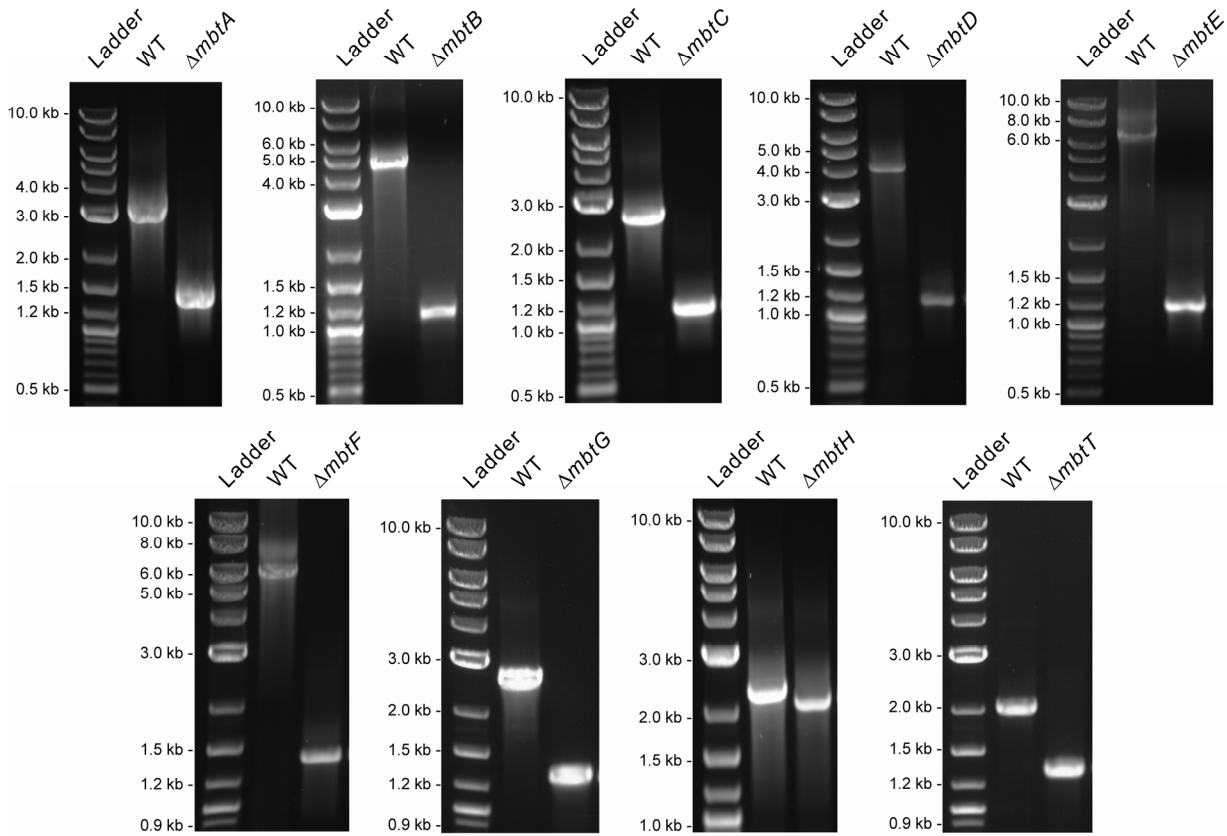

Figure S1. Agarose gel electrophoresis showing PCR-based confirmation of gene-specific deletions in  $\Delta mbt$  mutants. PCR primers and amplicon information used for mutant screening and verification is presented in Table S2.

**Table S3.** Amplicon information and PCR primers

| Amplicon name (bp)                | Primer name | Primer sequence (5'-3')                         | Characteristics                                                                         |
|-----------------------------------|-------------|-------------------------------------------------|-----------------------------------------------------------------------------------------|
| $\Delta$ mbtAc 5' arm (681)       | mbtAIF      | GCTGAGGCGGACCTACACGGCTGGACCTCGGTGGGTAGGCGAAAT   |                                                                                         |
|                                   | mbtAOR      | GGGTGTGGCGGTCCGCAAATCCTCGACGGTGACCGGAAATTCGTT   |                                                                                         |
| $\Delta$ mbtAc 3' arm (679)       | mbtAIR      | CGAGGTCCAGCCGTGTAGTCCGCCTCAGCGCCGGCCGAGTTCTGA   | Cloned using natural <i>Hind</i> III and <i>Not</i> I site from pCR2.1 Topo into p2NIL  |
|                                   | mbtAOF      | CGGTGGCATAGACAGACAGGGCTGTCTATTGCCGTTTTTCGGGTTA  |                                                                                         |
| $\Delta$ mbtAc full-length (1332) | mbtAOR      | GGGTGTGGCGGTCCGCAAATCCTCGACGGTGACCGGAAATTCGTT   |                                                                                         |
|                                   | mbtAOF      | CGGTGGCATAGACAGACAGGGCTGTCTATTGCCGTTTTTCGGGTTA  |                                                                                         |
| $\Delta$ mbtBc 5' arm (621)       | mbtBOF      | GGATGGGACCTCACGAGTTCGCGTGCAAGGTCGCGGTGGTTCGAAA  |                                                                                         |
|                                   | mbtBIR      | GGTGTGAGTGCAGACATATGGCCTCCCGAACACGATTAGCACAG    |                                                                                         |
| $\Delta$ mbtBc 3' arm (612)       | mbtBIF      | TCGGGAGGCCATATGTCCGCACTCGACACCGCCGACATCGTGA     | Cloned using natural <i>Hind</i> III and <i>Not</i> I site from pCR2.1 Topo into p2NIL  |
|                                   | mbtBOR      | CGATCGTCACGCCCTGATCGCACGAGTACCGGTTGAACGCCTCGT   |                                                                                         |
| $\Delta$ mbtBc full-length (1203) | mbtBOF      | GGATGGGACCTCACGAGTTCGCGTGCAAGGTCGCGGTGGTTCGAAA  |                                                                                         |
|                                   | mbtBOR      | CGATCGTCACGCCCTGATCGCACGAGTACCGGTTGAACGCCTCGT   |                                                                                         |
| $\Delta$ mbtCc 5' arm (1022)      | mbtCOFNew   | ACGAGGACTTCTTCGAACTGGGCGGAGATCCGTGCTCGCGACCG    |                                                                                         |
|                                   | mbtCIR      | CGCGGCCCTCCGGATCTCACCAGAGCTCATTGACCAGCTCCGCGA   |                                                                                         |
| $\Delta$ mbtCc 3' arm (1031)      | mbtCIF      | ATGAGCTCTGGTGAATCCCGAGGCCGCGTGATGACCGACGGAA     | Cloned using natural <i>Kpn</i> I and <i>Not</i> I site from pCR2.1 Topo into p2NIL.    |
|                                   | mbtCORNew   | TGACGACGTCGGCCGTGGCCGAGCCGATGAAGTGCACGGGAGTCT   |                                                                                         |
| $\Delta$ mbtCc full-length (2021) | mbtCOFNew   | ACGAGGACTTCTTCGAACTGGGCGGAGATCCGTGCTCGCGACCG    |                                                                                         |
|                                   | mbtCORNew   | TGACGACGTCGGCCGTGGCCGAGCCGATGAAGTGCACGGGAGTCT   |                                                                                         |
| $\Delta$ mbtDc 5' arm (598)       | mbtDOF      | CGCGGCGATGTTCTGCTCCTGCAACGCCGGTCCGCCGAGTGCAGCA  |                                                                                         |
|                                   | mbtDIR      | GAACGTTTTCTTTTCGGTTCATCACGCGGCTCCGGGATCGCGACC   |                                                                                         |
| $\Delta$ mbtDc 3' arm (594)       | mbtDIF      | GGCCGCGTGATGACCGAAAAGGAAACGTTCTCGCGTGACTGACAT   | Cloned using natural <i>Hind</i> III and <i>Not</i> I site from pCR2.1 Topo into p2NIL. |
|                                   | mbtDOR      | AACCGTCGTCCCATGCGATGTGGTGTGCGACGAGCAGCAGTACGT   |                                                                                         |
| $\Delta$ mbtDc full-length (1148) | mbtDOF      | ACGAGGACTTCTTCGAACTGGGCGGAGATCCGTGCTCGCGACCG    |                                                                                         |
|                                   | mbtDOR      | AACCGTCGTCCCATGCGATGTGGTGTGCGACGAGCAGCAGTACGT   |                                                                                         |
| $\Delta$ mbtEc 5' arm (599)       | mbtEOF      | CGCGAACCCTGCTCGACGTCATGGCGGAACGGCTTCGCTCCGA     |                                                                                         |
|                                   | mbtEIR      | TCGTTTCCCGTCTTGAATGTCAGTCACGCGAGAACGTTTCCTTTT   |                                                                                         |
| $\Delta$ mbtEc 3' arm (607)       | mbtEIF      | CGCGTGACTGACATTCAGACGGGAAACGATGACCGCCACCGGAA    | Cloned using natural <i>Hind</i> III and <i>Not</i> I site from pCR2.1 Topo into p2NIL. |
|                                   | mbtEOR      | TCATGATCGCGCCCGGCGAGCCAGCCGATGTAATCACGGTACGGT   |                                                                                         |
| $\Delta$ mbtEc full-length (1176) | mbtEOF      | CGCGAACCCTGCTCGACGTCATGGCGGAACGGCTTCGCTCCGA     |                                                                                         |
|                                   | mbtEOR      | TCATGATCGCGCCCGGCGAGCCAGCCGATGTAATCACGGTACGGT   |                                                                                         |
| $\Delta$ mbtFc 5' arm (770)       | mbtFOF      | GCTGTGGATGCGTCCGCTGAAGCCGCGAACGGCGTTGCCGCACAA   |                                                                                         |
|                                   | mbtFIR      | CCGTCTCGCTCACTCGGCGGTTCATCGTTTCCCGTCTTGGCTCTGA  |                                                                                         |
| $\Delta$ mbtFc 3' arm (614)       | mbtFIF      | GAAACGATGACCGCCGAGTGAAGCGAGACGGTGAAGCGAGAGAGTGA | Cloned using natural <i>Hind</i> III and <i>Not</i> I site from pCR2.1 Topo into p2NIL. |
|                                   | mbtFOR      | CTGCGCGATGGACAACACACGCGGGTTGCCGGGAAGGATCGACCT   |                                                                                         |
| $\Delta$ mbtFc full-length (1354) | mbtFOF      | GCTGTGGATGCGTCCGCTGAAGCCGCGAACGGCGTTGCCGCACAA   |                                                                                         |
|                                   | mbtFOR      | CTGCGCGATGGACAACACACGCGGGTTGCCGGGAAGGATCGACCT   |                                                                                         |
| $\Delta$ mbtGc 5' arm (594)       | mbtGOF      | ACGCGGACAGCCGACACCCGCGCCGCTCTTGGCGCTGGAACCCA    |                                                                                         |
|                                   | mbtGIR      | TCTGCTGATCGTTCGCTCGCTCACTCTCTCGCTCACCGTCTCGCT   |                                                                                         |
| $\Delta$ mbtGc 3' arm (683)       | mbtGIF      | GAGAGAGTGAGCGAGCGAACGATCAGGAGAACCAGTGAACACAA    |                                                                                         |
|                                   | mbtGOR      | CCGCGCCGTGAGCAGGTGAAAGCAACCAGTGGAAAATTCGCGGAT   |                                                                                         |

|                                      |        |                                                 |                                                                                                |
|--------------------------------------|--------|-------------------------------------------------|------------------------------------------------------------------------------------------------|
| $\Delta$ mbtGc full-length<br>(1247) | mbtGOF | ACGCGGACAGCCGACACCCGCGCCGCTCTTGGCGCTGGAAACCCA   |                                                                                                |
|                                      | mbtGOR | CCGCGCCGTGAGCAGGTGAAAGCAACCGGTGGAAAATTCGCCGAT   |                                                                                                |
| $\Delta$ mbtHc 5' arm<br>(1027)      | mbtHOF | CAGTCCTATCTCGTCGACATCGGCCAGTTCGCGGAGTGGAT       |                                                                                                |
|                                      | mbtHIR | CTATCGAACGGCCTCGAAGGTGCCGTTGTCGTCATCGAACGGATTGG |                                                                                                |
| $\Delta$ mbtHc 3' arm<br>(1036)      | mbtHIF | GACAACGGCACCTTCGAGGCCGTTTCGATAGGCCCGTTTCAGGC    | Cloned using natural<br><i>Bam</i> HI and <i>Sac</i> I site<br>from pCR2.1 Topo into<br>p2NIL. |
|                                      | mbtHOR | GAGCTCTGGTCCACGCGCCCGGTGTCGGTGATCA              |                                                                                                |
| $\Delta$ mbtHc full-length<br>(2033) | mbtHOF | CAGTCCTATCTCGTCGACATCGGCCAGTTCGCGGAGTGGAT       |                                                                                                |
|                                      | mbtHOR | GAGCTCTGGTCCACGCGCCCGGTGTCGGTGATCA              |                                                                                                |
| $\Delta$ mbtTc 5' arm<br>(711)       | mbtTOF | CCGCGTCAAGCTCAGCGGCTACCGCATCGAACTGGGCGAGGTCTGA  |                                                                                                |
|                                      | mbtTIR | GACCAGCTCCGCGACTTCGAGCGAGACCTCGGTGCCCGTCCAGAT   |                                                                                                |
| $\Delta$ mbtTc 3' arm<br>(719)       | mbtTIF | GAGGTCTGCCTCGAAGTCGCGGAGCTGGTCAATGAGCTCTGGTGA   | Cloned using natural<br><i>Hind</i> III and <i>Not</i> I site from<br>pCR2.1 Topo into p2NIL.  |
|                                      | mbtTOR | GGCGGCAGCGCCGTCGTCGGACAGTGCCTGCTGTTGGAGAATT     |                                                                                                |
| $\Delta$ mbtTc full-length<br>(1400) | mbtTOF | CCGCGTCAAGCTCAGCGGCTACCGCATCGAACTGGGCGAGGTCTGA  |                                                                                                |
|                                      | mbtTOR | GGCGGCAGCGCCGTCGTCGGACAGTGCCTGCTGTTGGAGAATT     |                                                                                                |
| RBS- <i>mbtA</i><br>(1708)           | mbtAF  | GAATTCGAGGTCCAGCCGTGACTCTGACCA                  | <i>Eco</i> RI                                                                                  |
|                                      | mbtAR  | AAGCTTTGAGGCGGACCTACCCGCCGAGCT                  | <i>Hind</i> III                                                                                |
| RBS- <i>mbtC</i><br>(1337)           | mbtCF  | CTGCAGCGTCGCGGAGCTGGTCAATGAGCT                  | <i>Pst</i> I                                                                                   |
|                                      | mbtCR  | AAGCTTTGCGTATCACGCGCCTCCGGGA                    | <i>Hind</i> III                                                                                |
| RBS- <i>mbtG</i><br>(1357)           | mbtGF  | GAATTCGAGGTGAGCGAGACGGTGGAGCGA                  | <i>Eco</i> RI                                                                                  |
|                                      | mbtGR  | AAGCTTGCCGTTGTCGTCATCGAACGGATT                  | <i>Hind</i> III                                                                                |
| RBS- <i>mbtH</i><br>(248)            | mbtHF  | CTGCAGAACGATCAGGAGAACCAGTGGAGCA                 | <i>Pst</i> I                                                                                   |
|                                      | mbtHR  | AAGCTTCTGAACGGCCCTATCGAACGGCCT                  | <i>Hind</i> III                                                                                |
| RBS- <i>mbtT</i><br>(787)            | mbtTF  | CTGCAGCTCGACACCCGCGGACATCGTGA                   | <i>Pst</i> I                                                                                   |
|                                      | mbtTR  | AAGCTTACCGGTCCTCACCAGAGCTCATT                   | <i>Hind</i> III                                                                                |
| RBS- <i>mbtB</i> B1<br>(1845)        | mbtB1F | AAGCTTGTGTTCCGGGAGGCCATATGGGCGA                 | <i>Hind</i> III                                                                                |
|                                      | mbtB1R | CCTTTGGGTCCCATCACCGGACGCTCTCA                   | Natural <i>Ppu</i> MI<br>Site in the gene                                                      |
| RBS- <i>mbtB</i> B2<br>(1705)        | mbtB2F | GGTGAGAGCGTCGCGGTGATGGGACCCAAA                  |                                                                                                |
|                                      | mbtB2R | GCTAGCAGACCTCGGTGCCCGTCACGATGT                  | <i>Nhe</i> I                                                                                   |
| RBS- <i>mbtD</i> D1<br>(1449)        | mbtD1F | AAGCTTGCGATCCCGGAGGCCGCGTATGA                   | <i>Hind</i> III                                                                                |
|                                      | mbtD1R | CGATGCGGTGGTGTCGGACACTTCGGGCA                   | Natural <i>Bsp</i> EI                                                                          |
| RBS- <i>mbtD</i> D2<br>(1574)        | mbtD2F | CGAAGTGTCGGACACCACCGCATCGCGGT                   |                                                                                                |
|                                      | mbtD2R | GCTAGCATCGGCAATGTGAGTACGCGGAGA                  | <i>Nhe</i> I                                                                                   |
| RBS- <i>mbtE</i> E1<br>(1458)        | mbtE1F | AAGCTTCGAAAAGGAAACGTTCTCGCGTGA                  | <i>Hind</i> III                                                                                |
|                                      | mbtE1R | GGGTGTGTCGAAGGCCCTCGCCGGTGGCCAT                 | Natural <i>Stu</i> I                                                                           |
| RBS- <i>mbtE</i> E2<br>(2125)        | mbtE2F | CGGATGGCCACCGCGAGGCCCTTCGACACA                  |                                                                                                |
|                                      | mbtE2R | ACAGCACGTGGTGTGTCAGCGGTGGTCAGCA                 | Natural <i>B</i> l <i>p</i> I                                                                  |
| RBS- <i>mbtE</i> E3<br>(1906)        | mbtE3F | TGCTGACCACCGCTGAGCACCACGTGCTGT                  |                                                                                                |
|                                      | mbtE3R | GCTAGCCCGGTGGCGGTGTCGTTTCCCGT                   | <i>Nhe</i> I                                                                                   |
| RBS- <i>mbtF</i> F1<br>(1267)        | mbtF1F | AAGCTTCAGAGCCAAGACGGGAAACGATGA                  | <i>Hind</i> III                                                                                |
|                                      | mbtF1R | TCGAGCATTCCGAATGCGCCGTCGAGTGTT                  | Natural <i>B</i> s <i>m</i> I                                                                  |
| RBS- <i>mbtF</i> F2<br>(1890)        | mbtF2F | AACACTCGACGGCGCATTGGGAATGCTCGA                  |                                                                                                |
|                                      | mbtF2R | AATCCTCAGGAGTGTGGTCGACGGCAGCGT                  | Natural <i>B</i> s <i>u</i> 36I                                                                |
| RBS- <i>mbtF</i> F3<br>(1313)        | mbtF3F | ACGCTGCCGTCGACCACACTCCTGAGGATT                  |                                                                                                |
|                                      | mbtF3R | GCTAGCTCGTCTGCTCACTCTCTCGCTCA                   | <i>Nhe</i> I                                                                                   |

*M. smegmatis* wild-type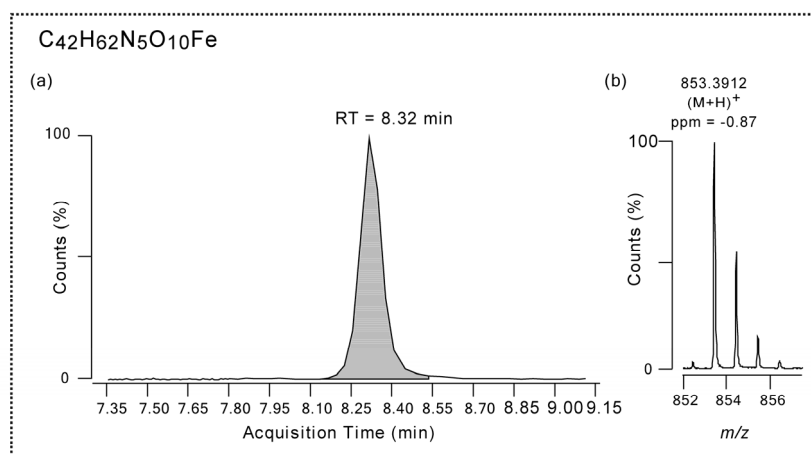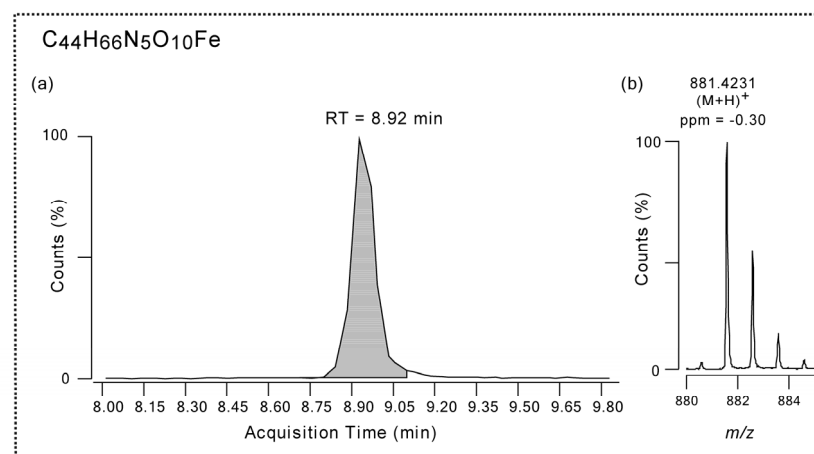*M. smegmatis*  $\Delta mbtH$ 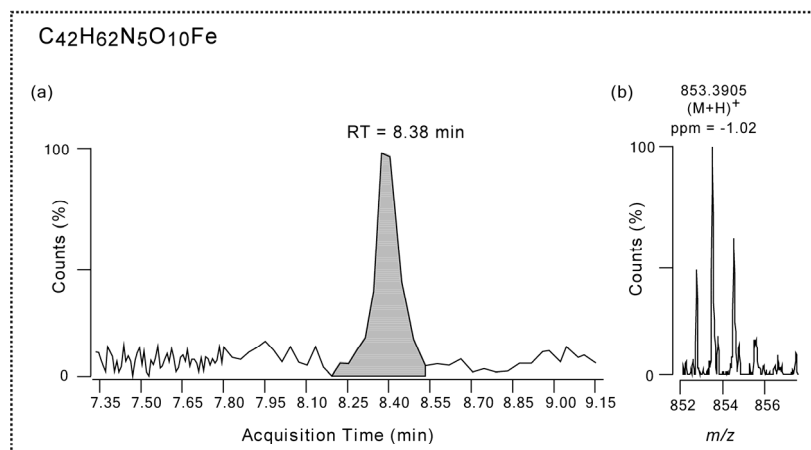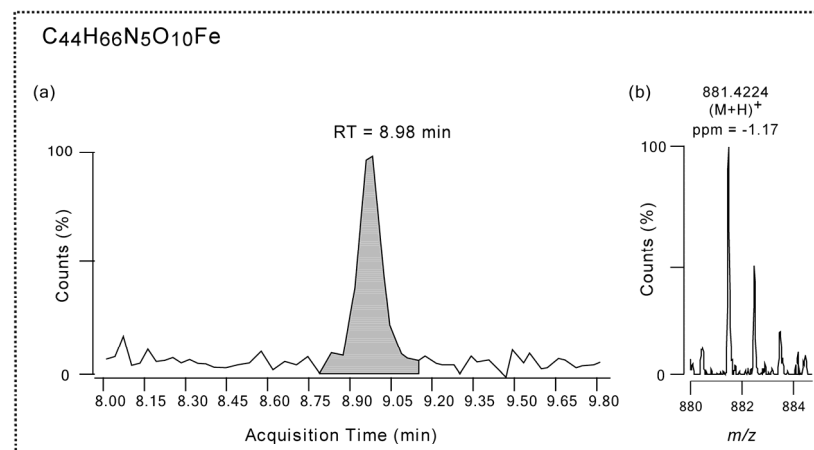

**Figure S2. Extracted ion chromatograms (a) and mass spectra (b) supporting the presence of mycobactins in the *mbtH* knock-out mutant.** The data from *M. smegmatis* wild-type + pCP0 and *M. smegmatis*  $\Delta mbtH$  + pCP0 samples are consistent with the presence of two representative mycobactin species differing in the chain length of the acyl substituent on the hydroxylysine residue. The ion peak arrays in the left and right spectra match those predicted for ferrimycobactins of elemental composition  $C_{42}H_{62}N_5O_{10}Fe$  and  $C_{44}H_{66}N_5O_{10}Fe$ , respectively, with less than 1.5 ppm error. Only the  $m/z$  of the most prominent  $(M+H)^+$  ion peak in the isotopic distribution is indicated in each spectrum. The retention time (RT) is indicated in the chromatograms. Ferrimycobactin-derived ions were not detected by LC-MS in samples from *M. smegmatis*  $\Delta mbtC$  + pCP0 (not shown), a representative mycobactin deficient mutant (Fig. 3). Mass spectral data was collected on an Agilent Technologies G6520A high resolution Q-TOF mass spectrometer attached to an Agilent Technologies 1200 Capillary HPLC system. Samples were ionized by electrospray ionization in positive mode. Chromatography was performed on an Thermo Hypersil Gold C8 column (2.1  $\times$  50 mm, 3  $\mu$ m, 175 Å, Part No. 25203-052130) using water with 0.1% formic acid and 5  $\mu$ M ammonium formate (Solvent A) and methanol with 0.1% formic acid and 5  $\mu$ M ammonium formate (Solvent B) at a flow rate of 400  $\mu$ L/min. The HPLC gradient was as follows: 50%-100% B (0-10 min) and 100% B (10-15 min). Total analysis time was 15 min. The HPLC eluent was diverted to waste for the first 1.5 minutes. The temperature of the column was held at 50°C for the entire analysis. Mass spectrometer parameters were as follows: fragmentor = 165 V; drying gas temperature = 300°C; drying gas flow = 10 L/min; nebulizer pressure = 25 psi; capillary voltage = 3,500 V. Data was collected with the instrument set to low mass range (100-1,700  $m/z$ ) extended dynamic range conditions (2 GHz mode) and data was stored as both centroid and profile spectra with a threshold of 10 counts for MS mode. MS spectra were collected over a range of 100-1,700  $m/z$  at 2 spectra/sec. The reference masses used were purine with  $M+H^+$  ion at 121.0508  $m/z$  and HP-922 with  $M+H^+$  ion at 922.009798  $m/z$ , were infused into the spray chamber using Agilent's calibrant delivery system. The instrument was controlled with Agilent MassHunter Workstation Acquisition Software B.03.01 and data was analyzed using Agilent MassHunter Workstation Qualitative Analysis Software B.04.00.

**Table S4.** Sequence accession numbers of 16S rRNA genes and sequence information of *mbt* genes and their orthologs

| Bacterium                              | 16SrDNA   | A <sup>a</sup>                             | B                                          | C                                          | D                                          | E                                          | F                                          | G                                          | H                                            | I                                          | J                                          | T                                      |
|----------------------------------------|-----------|--------------------------------------------|--------------------------------------------|--------------------------------------------|--------------------------------------------|--------------------------------------------|--------------------------------------------|--------------------------------------------|----------------------------------------------|--------------------------------------------|--------------------------------------------|----------------------------------------|
| <i>M. abscessus</i> ATCC 19977         | NC_010397 | YP_001702982/<br>MAB_2247c                 | YP_001702859/<br>MAB_2124                  | YP_001702855/<br>MAB_2120c                 | YP_001702854/<br>MAB_2119c                 | YP_001702857/<br>MAB_2122                  | YP_001702858/<br>MAB_2123                  | YP_001702984/<br>MAB_2249                  | YP_001702985/<br>MAB_2250                    | YP_001702980/<br>MAB_2245                  | NP                                         | YP_001702856/<br>MAB_2121c             |
| <i>M. avium</i> 104                    | NC_008595 | YP_881227/<br>MAV_2008                     | YP_881228/<br>MAV_2009                     | YP_881230/<br>MAV_2011                     | YP_881231/<br>MAV_2012                     | YP_881232/<br>MAV_2013                     | YP_881233/<br>MAV_2014                     | YP_881234/<br>MAV_2015                     | YP_882427/<br>MAV_3245                       | YP_881016/<br>MAV_1792                     | YP_881022/<br>MAV_1798                     | YP_881229/<br>MAV_2010                 |
| <i>M. avium paratuberculosis</i> K-10  | NC_002944 | NP_961112/<br>MAP2178/<br><i>mbtA</i>      | NP_961111/<br>MAP2177c/<br><i>mbtB</i>     | NP_961109/<br>MAP2175c/<br><i>mbtC</i>     | NP_961108/<br>MAP2174c/<br><i>mbtD</i>     | NP_961107/<br>MAP2173c/<br><i>mbtE</i>     | NP_961105/<br>MAP2171c/<br><i>mbtF</i>     | NP_961104/<br>MAP2170c/<br><i>mbtG</i>     | NP_961103/<br>MAP2169c/<br><i>mbtH_3</i>     | NP_961139/<br>MAP2205c/<br><i>trpE2</i>    | NP_961131/<br>MAP2197/<br><i>lipK</i>      | NP_961110/<br>MAP2176c/<br><i>mbtI</i> |
| <i>M. bovis</i> BCG 1173P2             | NC_008769 | CAL72386/<br>BCG_2398/<br><i>mbtA</i>      | YP_978486/<br>BCG_2397c/<br><i>mbtB</i>    | YP_978485/<br>BCG_2396c/<br><i>mbtC</i>    | YP_978484/<br>BCG_2395c/<br><i>mbtD</i>    | YP_978483/<br>BCG_2394c/<br><i>mbtE</i>    | YP_978482/<br>BCG_2393c/<br><i>mbtF</i>    | YP_978481/<br>BCG_2392c/<br><i>mbtG</i>    | YP_978480/<br>BCG_2391c/<br><i>mbtI</i>      | YP_978489/<br>BCG_2400c/<br><i>mbtJ</i>    | YP_978488/<br>BCG_2399                     | B-T                                    |
| <i>M. bovis subsp. bovis</i> AF2122/97 | BX248338  | *                                          | *                                          | *                                          | *                                          | *                                          | *                                          | *                                          | *                                            | *                                          | *                                          | *                                      |
| <i>M. gilvum</i> PYR-GCK               | NC_009338 | YP_001133956/<br>Mflv_2691                 | YP_001133957/<br>Mflv_2692                 | YP_001133959/<br>Mflv_2694                 | YP_001133960/<br>Mflv_2695                 | YP_001133961/<br>Mflv_2696                 | YP_001133962/<br>Mflv_2697                 | YP_001133963/<br>Mflv_2698                 | YP_001133964/<br>Mflv_2699                   | YP_001134864/<br>Mflv_3602                 | YP_001135862/<br>Mflv_4606                 | YP_001133958/<br>Mflv_2693             |
| <i>M. marinum</i> M                    | NC_010612 | YP_001851969/<br>MMAR_3698/<br><i>mbtA</i> | YP_001851960/<br>MMAR_3689/<br><i>mbtB</i> | YP_001851965/<br>MMAR_3694/<br><i>mbtC</i> | YP_001851966/<br>MMAR_3695/<br><i>mbtD</i> | YP_001851962/<br>MMAR_3691/<br><i>mbtE</i> | YP_001851961/<br>MMAR_3690/<br><i>mbtF</i> | YP_001851968/<br>MMAR_3697/<br><i>mbtG</i> | YP_001851967/<br>MMAR_3696/<br><i>mbtH_1</i> | YP_001851977/<br>MMAR_3706/<br><i>mbtI</i> | YP_001851970/<br>MMAR_3699/<br><i>mbtJ</i> | YP_001851964/<br>MMAR_3693             |
| <i>M. smegmatis</i> MC2 155            | NC_008596 | YP_888788/<br>MSMEG_4516                   | YP_888787/<br>MSMEG_4515                   | YP_888785/<br>MSMEG_4513                   | YP_888784/<br>MSMEG_4512                   | YP_888783/<br>MSMEG_4511                   | YP_888782/<br>MSMEG_4510                   | YP_888781/<br>MSMEG_4509                   | YP_888780/<br>MSMEG_4508                     | YP_888796/<br>MSMEG_4524                   | YP_889517/<br>MSMEG_5271                   | YP_888786/<br>MSMEG_4514               |
| <i>M. sp.</i> JLS                      | NC_009077 | YP_001071751/<br>Mjls_3482                 | YP_001071750/<br>Mjls_3481                 | YP_001071748/<br>Mjls_3479                 | YP_001071747/<br>Mjls_3478                 | YP_001071746/<br>Mjls_3477                 | YP_001071745/<br>Mjls_3476                 | YP_001071744/<br>Mjls_3475                 | YP_001071743/<br>Mjls_3474                   | YP_001071742/<br>Mjls_3069                 | YP_001071472/<br>Mjls_3202                 | YP_001071749/<br>Mjls_3480             |
| <i>M. sp.</i> KMS                      | NC_008705 | YP_939518/<br>Mkms_3534                    | YP_939517/<br>Mkms_3533                    | YP_939515/<br>Mkms_3531                    | YP_939514/<br>Mkms_3530                    | YP_939513/<br>Mkms_3529                    | YP_939512/<br>Mkms_3528                    | YP_939511/<br>Mkms_3527                    | YP_939510/<br>Mkms_3526                      | YP_939096/<br>Mkms_3112                    | YP_939239/<br>Mkms_3255                    | YP_939516/<br>Mkms_3532                |
| <i>M. sp.</i> MCS                      | NC_008146 | YP_640634/<br>Mmcs_3471                    | YP_640633/<br>Mmcs_3470                    | YP_640631/<br>Mmcs_3468                    | YP_640630/<br>Mmcs_3467                    | YP_640629/<br>Mmcs_3466                    | YP_640628/<br>Mmcs_3465                    | YP_640627/<br>Mmcs_3464                    | YP_640626/<br>Mmcs_3463                      | YP_640216/<br>Mmcs_3053                    | YP_640356/<br>Mmcs_3193                    | YP_640632/<br>Mmcs_3469                |
| <i>M. tuberculosis</i> CDC1551         | NC_002755 | *                                          | *                                          | *                                          | *                                          | *                                          | *                                          | *                                          | *                                            | *                                          | *                                          | *                                      |
| <i>M. tuberculosis</i> H37Ra           | NC_009525 | *                                          | *                                          | *                                          | *                                          | *                                          | *                                          | *                                          | *                                            | *                                          | *                                          | *                                      |
| <i>M. tuberculosis</i> H37Rv           | BX842576  | NP_216900/<br>Rv2384/<br><i>mbtA</i>       | NP_216899/<br>Rv2383c/<br><i>mbtB</i>      | NP_216898/<br>Rv2382c/<br><i>mbtC</i>      | NP_216897/<br>Rv2381c/<br><i>mbtD</i>      | NP_216896/<br>Rv2380c/<br><i>mbtE</i>      | NP_216895/<br>Rv2379c/<br><i>mbtF</i>      | NP_216894/<br>Rv2378c/<br><i>mbtG</i>      | NP_216893/<br>Rv2377c/<br><i>mbtH</i>        | YP_177877/<br>Rv2386c/<br><i>mbtI</i>      | YP_177876/<br>Rv2385/<br><i>mbtJ</i>       | B-T                                    |
| <i>M. tuberculosis</i> F11             | NC_009565 | *                                          | *                                          | *                                          | *                                          | *                                          | *                                          | *                                          | *                                            | *                                          | *                                          | *                                      |
| <i>M. ulcerans</i> Agy99               | NC_008611 | YP_907245/<br>MUL_3641/<br><i>mbtA</i>     | YP_907236/<br>MUL_3632/<br><i>mbtB</i>     | YP_907241/<br>MUL_3637/<br><i>mbtC</i>     | YP_907242/<br>MUL_3638/<br><i>mbtD</i>     | YP_907238/<br>MUL_3634/<br><i>mbtE</i>     | YP_907237/<br>MUL_3633/<br><i>mbtF</i>     | YP_907244/<br>MUL_3640/<br><i>mbtG</i>     | YP_907243/<br>MUL_3639/<br><i>mbtH_1</i>     | YP_907251/<br>MUL_3648/<br><i>mbtI</i>     | YP_907246/<br>MUL_3642/<br><i>mbtJ</i>     | YP_907240/<br>MUL_3636/<br><i>mbtK</i> |
| <i>M. vanbaalenii</i> PYR-1            | NC_008726 | YP_954637/<br>Mvan_3850                    | YP_954636/<br>Mvan_3849                    | YP_954634/<br>Mvan_3847                    | YP_954633/<br>Mvan_3846                    | YP_954632/<br>Mvan_3845                    | YP_954631/<br>Mvan_3844                    | YP_954630/<br>Mvan_3843                    | YP_954629/<br>Mvan_3842                      | YP_953627/<br>Mvan_2814                    | YP_955456/<br>Mvan_4675                    | YP_954635/<br>Mvan_3848                |
| <i>N. farcinica</i> IFM 10152          | NC_006361 | YP_116979/<br>nfa6200                      | YP_116977/<br>nfa7680/<br>nbtF             | YP_116973/<br>nfa7640/<br>nbtB             | YP_116974/<br>nfa7650/<br>nbtC             | YP_116975/<br>nfa7660/<br>nbtD             | YP_116976/<br>nfa7670/<br>nbtE             | YP_116970/<br>nfa7610/<br>nbtG             | NP                                           | YP_116828/<br>nfa6190                      | YP_116414/<br>nfa2080                      | YP_116972/<br>nfa7630                  |

<sup>a</sup>, letters in column headings correspond to the letter nomenclature of the *mbt* genes of *M. tuberculosis*. Sequence information is given in the format: accession number / locus tag / gene name (when available). The star (\*) indicates that the sequence is identical to that in the strain of the same species for which sequence information is given. Only one representative strain per species was included in our parsimonious reconstruction analysis when the sequences were identical. B-T indicates a gene fusion that results in the fusion of MbtT to the C-terminus of MbtB. NP indicates that the gene is not present.



**Reference**

- (1) **Onwueme, K. C., J. A. Ferreras, J. Buglino, C. D. Lima, and L. E. Quadri.** 2004. Mycobacterial polyketide-associated proteins are acyltransferases: Proof of principle with *Mycobacterium tuberculosis* PapA5. *Proc. Natl. Acad. Sci. U. S. A.* **101**:4608-4613.
- (2) **Parish, T., and N. G. Stoker.** 2000. Use of a flexible cassette method to generate a double unmarked *Mycobacterium tuberculosis tlyA plcABC* mutant by gene replacement. *Microbiology* **146**:1969-1975.
